# Supplementary material
Source: PubMed Central journal article supplement (PMC7027971)
Supplement: 41586_2017_BFnature23889_MOESM2_ESM.pdf [file 41586_2017_BFnature23889_MOESM2_ESM.pdf]

## Life Sciences Reporting Summary

Nature Research wishes to improve the reproducibility of the work that we publish. This form is intended for publication with all accepted life science papers and provides structure for consistency and transparency in reporting. Every life science submission will use this form; some list items might not apply to an individual manuscript, but all fields must be completed for clarity.

For further information on the points included in this form, see [Reporting Life Sciences Research](#). For further information on Nature Research policies, including our [data availability policy](#), see [Authors & Referees](#) and the [Editorial Policy Checklist](#).

### ▶ Experimental design

#### 1. Sample size

Describe how sample size was determined.

Since this is a pre-existing cohort, sample sizes were outside our control. Measures of inference certainty are provided where applicable (e.g. p-values, and uncertainties for the GP parameter fits).

#### 2. Data exclusions

Describe any data exclusions.

An ecological quality control step removed 86 samples (documented in Methods). Samples with too low coverage were excluded on a per-species basis from strain analysis (thresholds in Methods). Repeat visits were excluded from the cross-sectional results on function distributions (Fig. 2). Per-species abundance outliers were removed by the Grubbs outlier test for the dynamics estimation (Fig. 3, documented in Methods).

#### 3. Replication

Describe whether the experimental findings were reliably reproduced.

No replication.

#### 4. Randomization

Describe how samples/organisms/participants were allocated into experimental groups.

A grouped design was not used.

#### 5. Blinding

Describe whether the investigators were blinded to group allocation during data collection and/or analysis.

A grouped design was not used.

Note: all studies involving animals and/or human research participants must disclose whether blinding and randomization were used.

## 6. Statistical parameters

For all figures and tables that use statistical methods, confirm that the following items are present in relevant figure legends (or in the Methods section if additional space is needed).

n/a Confirmed

- The exact sample size ( $n$ ) for each experimental group/condition, given as a discrete number and unit of measurement (animals, litters, cultures, etc.)
- A description of how samples were collected, noting whether measurements were taken from distinct samples or whether the same sample was measured repeatedly
- A statement indicating how many times each experiment was replicated
- The statistical test(s) used and whether they are one- or two-sided (note: only common tests should be described solely by name; more complex techniques should be described in the Methods section)
- A description of any assumptions or corrections, such as an adjustment for multiple comparisons
- The test results (e.g.  $P$  values) given as exact values whenever possible and with confidence intervals noted
- A clear description of statistics including central tendency (e.g. median, mean) and variation (e.g. standard deviation, interquartile range)
- Clearly defined error bars

See the web collection on [statistics for biologists](#) for further resources and guidance.

## ► Software

Policy information about [availability of computer code](#)

## 7. Software

Describe the software used to analyze the data in this study.

Published and publicly available software was used to generate taxonomic and functional profiles (MetaPhlAn2, HUMAnN2, StrainPhlAn). R, Python, and Matlab were used to analyze the data and generate plots. Gaussian process modeling was performed with the GPstuff package in Matlab (scripts available from a link in Extended Data Table 2b). IBDA-UD was used for assembly, with a custom annotation pipeline described in the methods and available through a link in Extended Data Table 2b.

For manuscripts utilizing custom algorithms or software that are central to the paper but not yet described in the published literature, software must be made available to editors and reviewers upon request. We strongly encourage code deposition in a community repository (e.g. GitHub). [Nature Methods guidance for providing algorithms and software for publication](#) provides further information on this topic.

## ► Materials and reagents

Policy information about [availability of materials](#)

## 8. Materials availability

Indicate whether there are restrictions on availability of unique materials or if these materials are only available for distribution by a for-profit company.

No unique materials were used.

## 9. Antibodies

Describe the antibodies used and how they were validated for use in the system under study (i.e. assay and species).

No antibodies were used.

## 10. Eukaryotic cell lines

a. State the source of each eukaryotic cell line used.

No eukaryotic cell lines were used.

b. Describe the method of cell line authentication used.

No eukaryotic cell lines were used.

c. Report whether the cell lines were tested for mycoplasma contamination.

No eukaryotic cell lines were used.

d. If any of the cell lines used are listed in the database of commonly misidentified cell lines maintained by [ICLAC](#), provide a scientific rationale for their use.

No commonly misidentified cell lines were used.

## ► Animals and human research participants

---

Policy information about [studies involving animals](#); when reporting animal research, follow the [ARRIVE guidelines](#)

### 11. Description of research animals

Provide details on animals and/or animal-derived materials used in the study.

No animals were used.

Policy information about [studies involving human research participants](#)

### 12. Description of human research participants

Describe the covariate-relevant population characteristics of the human research participants.

Characteristics of the human cohort are summarized in Extended Data Table 2a.
